# Supplementary material
Source: publisher site journal article supplement (https://www.dovepress.com/article/107796)
Supplement: Supplementary file 1 [file get_supplementary_file.php]

**Table S1: Search strategy in OVIDSP**

Database: Ovid MEDLINE(R)

Search Strategy:

- 
- 1 Health Knowledge, Attitudes, Practice/ (69312)
  - 2 barrier\$.mp. (166811)
  - 3 change.mp. (726702)
  - 4 practice.mp. (640043)
  - 5 clinical.mp. (2788042)
  - 6 modification.mp. (180134)
  - 7 improvement.mp. (360738)
  - 8 Area Health Education Centers/ or Attitude to Health/ or Health Education/ or Health Education, Dental/ or "Attitude of Health Personnel"/ or Health Promotion/ or Health/ (263257)
  - 9 Health Behavior/ or Behavior/ (58004)
  - 10 1 or 4 or 8 or 9 (884755)
  - 11 3 or 6 or 7 (1217052)
  - 12 10 and 11 (83647)
  - 13 2 and 12 (3934)
  - 14 5 and 13 (1349)
  - 15 survey.mp. (308253)
  - 16 questionnaire.mp. or Questionnaires/ (402475)
  - 17 15 or 16 (628026)
  - 18 14 and 17 (401)
  - 19 Guideline Adherence/ (19180)
  - 20 18 and 19 (41)

**Table S2: Items in each questionnaire covered/ not covered by various domains of TDF**

|                                                                                      | Total number of items in each questionnaire | Domains of TDF |        |                                         |                            |          |                            |               |           |       |                                          |                                     |                   |         |                       |                    |
|--------------------------------------------------------------------------------------|---------------------------------------------|----------------|--------|-----------------------------------------|----------------------------|----------|----------------------------|---------------|-----------|-------|------------------------------------------|-------------------------------------|-------------------|---------|-----------------------|--------------------|
|                                                                                      |                                             | Knowledge      | Skills | Social/ Professional/ Role and Identity | Beliefs about capabilities | Optimism | Beliefs about consequences | Reinforcement | Intention | Goals | Memory, Attention and Decision processed | Environmental Context and Resources | Social influences | Emotion | Behavioral Regulation | Not covered by TDF |
| <b>Papers [1–50]</b>                                                                 |                                             |                |        |                                         |                            |          |                            |               |           |       |                                          |                                     |                   |         |                       |                    |
| Assessment of perceived barriers in self-care of insulin-requiring diabetic patients | 28                                          | 0              | 0      | 0                                       | 16                         | 3        | 2                          | 0             | 1         | 1     | 0                                        | 1                                   | 0                 | 3       | 1                     | 0                  |
| Evaluating and Overcoming Barriers to Taking Abuse Histories                         | 14                                          | 0              | 3      | 2                                       | 0                          | 0        | 1                          | 1             | 0         | 2     | 1                                        | 0                                   | 0                 | 3       | 0                     | 1                  |
| The “ICK” Factor, Anticipated Regret, and Willingness to Become an Organ Donor       | 16                                          | 0              | 0      | 0                                       | 0                          | 4        | 7                          | 1             | 1         | 0     | 0                                        | 0                                   | 0                 | 1       | 0                     | 2                  |
| Identifying Perceived Personal Barriers to Public Policy Advocacy Within Psychology  | 11                                          | 3              | 0      | 1                                       | 0                          | 0        | 1                          | 0             | 2         | 0     | 1                                        | 2                                   | 0                 | 1       | 0                     | 0                  |
| Stigma and Barriers to Mental Health Care in Deployed Canadian Forces Personnel      | 19                                          | 1              | 0      | 0                                       | 2                          | 0        | 7                          | 0             | 0         | 0     | 0                                        | 6                                   | 3                 | 0       | 0                     | 0                  |
| Behavioral Health in the Pediatric Primary Care Setting: Needs, Barriers, and        | 6                                           | 1              | 0      | 0                                       | 0                          | 0        | 0                          | 0             | 0         | 0     | 0                                        | 4                                   | 0                 | 1       | 0                     | 0                  |

|                                                                                                                         |    |   |   |   |   |   |   |   |   |   |   |    |   |   |   |   |
|-------------------------------------------------------------------------------------------------------------------------|----|---|---|---|---|---|---|---|---|---|---|----|---|---|---|---|
| Implications for Psychologists                                                                                          |    |   |   |   |   |   |   |   |   |   |   |    |   |   |   |   |
| Perceived Barriers to Care Among Veterans Health Administration Patients With Posttraumatic Stress Disorder             | 25 | 1 | 0 | 3 | 1 | 4 | 1 | 0 | 3 | 1 | 1 | 7  | 2 | 1 | 0 | 0 |
| Barriers to Enteral Feeding Critically Ill Patients Questionnaire                                                       | 26 | 1 | 0 | 1 | 0 | 0 | 0 | 0 | 0 | 0 | 1 | 20 | 2 | 1 | 0 | 0 |
| Providing education on evidence-based practice improved knowledge but did not change behavior- a before and after study | 5  | 0 | 2 | 0 | 0 | 0 | 0 | 0 | 0 | 0 | 0 | 3  | 0 | 0 | 0 | 0 |
| Facilitators and Barriers in Implementing Buprenorphine in the Veterans Health Administration                           | 58 | 2 | 0 | 5 | 2 | 1 | 5 | 1 | 0 | 0 | 1 | 31 | 4 | 5 | 1 | 0 |
| Barriers to Implementing Treatment Integrity Procedures- Survey of Treatment Outcome Researchers                        | 30 | 3 | 0 | 0 | 1 | 1 | 1 | 1 | 0 | 0 | 0 | 17 | 4 | 0 | 1 | 1 |
| Barriers to Engagement in Sleep Restriction and Stimulus Control in Chronic Insomnia                                    | 5  | 0 | 0 | 0 | 0 | 0 | 1 | 0 | 0 | 0 | 0 | 0  | 1 | 3 | 0 | 0 |
| Measurement of Men's Help Seeking: Development and Evaluation of the Barriers                                           | 31 | 2 | 0 | 0 | 8 | 1 | 2 | 0 | 0 | 2 | 3 | 3  | 2 | 8 | 0 | 0 |

|                                                                                                                    |    |   |   |   |   |   |   |   |   |   |   |    |    |    |   |   |
|--------------------------------------------------------------------------------------------------------------------|----|---|---|---|---|---|---|---|---|---|---|----|----|----|---|---|
| to Help Seeking Scale                                                                                              |    |   |   |   |   |   |   |   |   |   |   |    |    |    |   |   |
| Perceived Employment Barriers and Their Relation to Workforce-Entry Intent Among People With HIV/AIDS              | 17 | 0 | 1 | 0 | 6 | 0 | 7 | 0 | 0 | 0 | 0 | 1  | 1  | 1  | 0 | 0 |
| Patterns-Correlates- and Barriers to Medication Adherence Among Persons Prescribed New Treatments for HIV Disease  | 10 | 0 | 0 | 0 | 0 | 1 | 1 | 0 | 0 | 0 | 2 | 1  | 2  | 0  | 2 | 1 |
| Faculty knowledge, attitudes, and perceived barriers to teaching evidence-based nursing                            | 27 | 2 | 0 | 2 | 1 | 0 | 4 | 0 | 0 | 0 | 0 | 0  | 15 | 2  | 0 | 1 |
| Implementing quality indicators in intensive care units: exploring barriers to and facilitators of behavior change | 11 | 2 | 0 | 1 | 1 | 1 | 3 | 0 | 1 | 0 | 0 | 1  | 0  | 0  | 1 | 0 |
| Barriers to participation in HIV drug trials                                                                       | 27 | 1 | 0 | 1 | 1 | 3 | 2 | 0 | 0 | 0 | 1 | 7  | 5  | 5  | 1 | 0 |
| The Yorkshire BARRIERS project-diagnostic analysis of barriers to research utilization                             | 29 | 2 | 1 | 1 | 3 | 2 | 3 | 0 | 0 | 0 | 0 | 10 | 3  | 1  | 1 | 2 |
| The Youth Form of the Motivators of and Barriers to Health-Smart Behaviors Inventory                               | 67 | 7 | 0 | 0 | 3 | 3 | 4 | 0 | 3 | 2 | 5 | 15 | 7  | 14 | 4 | 0 |

|                                                                                                                              |    |   |   |   |   |   |   |   |   |   |   |    |   |   |   |   |
|------------------------------------------------------------------------------------------------------------------------------|----|---|---|---|---|---|---|---|---|---|---|----|---|---|---|---|
| For me the taste of soy is not a barrier to its consumption. And how about you?                                              | 13 | 0 | 0 | 0 | 0 | 3 | 6 | 0 | 0 | 0 | 0 | 3  | 0 | 1 | 0 | 0 |
| Pediatric Intensive Care Unit Participatory Action Research (PICU PAR):.                                                     | 26 | 1 | 1 | 0 | 0 | 0 | 1 | 0 | 0 | 0 | 1 | 14 | 4 | 0 | 0 | 4 |
| Barriers to Care Questionnaire: Reliability, Validity, and Responsiveness to Change Among Parents of Children With Asthma    | 38 | 4 | 2 | 2 | 1 | 2 | 1 | 0 | 0 | 0 | 2 | 19 | 2 | 1 | 0 | 2 |
| Barriers to feeding critically ill patients: A multicenter survey of critical care nurses                                    | 9  | 0 | 0 | 1 | 0 | 0 | 0 | 0 | 0 | 1 | 0 | 5  | 1 | 0 | 0 | 1 |
| Measuring Perceived Barriers to Healthful Eating in Obese, Treatment-seeking Adults                                          | 14 | 2 | 0 | 0 | 6 | 0 | 1 | 0 | 0 | 0 | 0 | 3  | 0 | 2 | 0 | 0 |
| "I'm Not One of Them": Barriers to Help-Seeking Among American Indians With Alcohol Dependence                               | 37 | 4 | 0 | 0 | 3 | 1 | 3 | 1 | 3 | 0 | 0 | 7  | 6 | 6 | 1 | 2 |
| Barriers to implementing infection prevention and control guidelines during crises: Experiences of health care professionals | 24 | 1 | 0 | 4 | 2 | 1 | 1 | 0 | 0 | 0 | 0 | 14 | 1 | 0 | 0 | 0 |
| Barriers to treatment                                                                                                        | 19 | 1 | 2 | 0 | 3 | 0 | 1 | 0 | 0 | 1 | 0 | 4  | 5 | 2 | 0 | 0 |

|                                                                                                                                                               |    |   |    |   |   |   |   |   |   |   |   |    |   |   |   |   |
|---------------------------------------------------------------------------------------------------------------------------------------------------------------|----|---|----|---|---|---|---|---|---|---|---|----|---|---|---|---|
| among African Americans with obsessive-compulsive disorder                                                                                                    |    |   |    |   |   |   |   |   |   |   |   |    |   |   |   |   |
| Barriers to treatment of pediatric obstructive sleep apnea: Development of the adherence barriers to continuous positive airway pressure (CPAP) questionnaire | 12 | 0 | 0  | 0 | 0 | 0 | 0 | 0 | 0 | 0 | 2 | 3  | 0 | 6 | 0 | 1 |
| Changes in Young Women's Awareness, Attitudes, and Perceived Barriers to Using Emergency Contraception                                                        | 11 | 1 | 0  | 0 | 0 | 0 | 5 | 0 | 0 | 1 | 0 | 2  | 1 | 1 | 0 | 0 |
| Communication barriers perceived by older patients and nurses                                                                                                 | 30 | 0 | 28 | 0 | 0 | 0 | 0 | 0 | 0 | 0 | 0 | 0  | 0 | 2 | 0 | 0 |
| Development and psychometric testing of a short version of the Barriers Questionnaire-Taiwan form for cancer patient                                          | 9  | 1 | 0  | 0 | 0 | 2 | 4 | 0 | 0 | 0 | 1 | 0  | 1 | 0 | 0 | 0 |
| A tool to assess barriers to adherence to hand hygiene guideline                                                                                              | 36 | 4 | 0  | 6 | 2 | 0 | 7 | 0 | 0 | 0 | 0 | 15 | 0 | 0 | 2 | 0 |
| Patient-Related Barriers to Fatigue Communication: Initial Validation of the Fatigue Management                                                               | 28 | 2 | 0  | 4 | 4 | 0 | 6 | 0 | 0 | 1 | 0 | 1  | 2 | 3 | 3 | 2 |

|                                                                                                                                        |    |   |   |   |   |   |   |   |   |   |   |   |   |   |   |   |
|----------------------------------------------------------------------------------------------------------------------------------------|----|---|---|---|---|---|---|---|---|---|---|---|---|---|---|---|
| Barriers Questionnaire                                                                                                                 |    |   |   |   |   |   |   |   |   |   |   |   |   |   |   |   |
| Patterns of physical activity among American Indian children- an assessment of barriers and support                                    | 10 | 0 | 0 | 0 | 2 | 0 | 1 | 0 | 0 | 0 | 0 | 6 | 1 | 0 | 0 | 0 |
| What Prevents Adolescents from Seeking Help After a Suicide Education Program?                                                         | 26 | 2 | 0 | 0 | 3 | 1 | 8 | 0 | 0 | 1 | 0 | 5 | 5 | 1 | 0 | 0 |
| Addressing barriers to change-an RCT of practice-based education to improve the management of hypertension in the elderly              | 8  | 0 | 0 | 0 | 0 | 0 | 0 | 0 | 0 | 0 | 0 | 7 | 1 | 0 | 0 | 0 |
| Barriers to Caregiver Administration of Pain Medication in Hospice Care                                                                | 6  | 0 | 0 | 0 | 1 | 0 | 3 | 0 | 0 | 0 | 0 | 0 | 0 | 0 | 0 | 2 |
| Barriers to the Implementation of Physical Education (PE) Assessment in Hong Kong                                                      | 15 | 1 | 0 | 0 | 2 | 0 | 0 | 0 | 0 | 0 | 0 | 9 | 3 | 0 | 0 | 0 |
| Barriers to evidence-based practice in primary care                                                                                    | 14 | 0 | 0 | 0 | 5 | 0 | 1 | 1 | 0 | 1 | 0 | 5 | 1 | 0 | 0 | 0 |
| Comparison of Evidence-Based Practice Between Physicians and Nurses-A National Survey of Regional Hospitals in Taiwan- Barriers To EBP | 10 | 1 | 2 | 0 | 0 | 0 | 0 | 0 | 0 | 0 | 0 | 6 | 0 | 0 | 0 | 1 |

|                                                                                                                                                 |    |   |   |   |   |   |   |   |   |   |   |   |   |   |   |   |   |
|-------------------------------------------------------------------------------------------------------------------------------------------------|----|---|---|---|---|---|---|---|---|---|---|---|---|---|---|---|---|
| Doctors' traits perceived by Japanese nurses as communication barriers- A questionnaire survey                                                  | 5  | 1 | 0 | 0 | 0 | 0 | 0 | 0 | 0 | 0 | 0 | 0 | 4 | 0 | 0 | 0 | 0 |
| Impact of a Behavioral-Based Intervention on Inspiratory Muscle Training Prescription by a Multidisciplinary Team                               | 7  | 0 | 0 | 0 | 0 | 0 | 0 | 0 | 0 | 0 | 0 | 0 | 2 | 2 | 0 | 0 | 3 |
| Barriers and facilitators to implementing shared decision-making in clinical practice- a systematic review of health professionals' perceptions | 35 | 2 | 1 | 2 | 2 | 0 | 8 | 0 | 0 | 0 | 1 | 9 | 6 | 1 | 0 | 0 | 3 |
| Neighborhood Walking Among Overweight and Obese Adults- Age Variations in Barriers and Motivators                                               | 8  | 0 | 0 | 0 | 2 | 0 | 2 | 0 | 0 | 0 | 0 | 4 | 0 | 0 | 0 | 0 | 0 |
| Patient-related barriers to pain management- the barriers questionnaire II(BQ-II)                                                               | 8  | 0 | 0 | 0 | 1 | 0 | 6 | 0 | 0 | 0 | 0 | 0 | 0 | 0 | 1 | 0 | 0 |
| Practitioner and Organizational Barriers to Evidence-based Practice of Physical Therapists for People With Stroke                               | 10 | 1 | 2 | 0 | 0 | 0 | 1 | 0 | 0 | 0 | 0 | 4 | 1 | 0 | 0 | 0 | 1 |
| Preliminary validity of the barriers to treatment                                                                                               | 16 | 0 | 0 | 0 | 2 | 1 | 1 | 0 | 0 | 0 | 2 | 7 | 2 | 0 | 0 | 0 | 1 |



|                                                                                                                 |     |    |    |    |    |    |     |   |    |    |    |     |    |    |    |    |
|-----------------------------------------------------------------------------------------------------------------|-----|----|----|----|----|----|-----|---|----|----|----|-----|----|----|----|----|
| adherence questionnaire in fibromyalgia-combining quantitative and focus group data                             |     |    |    |    |    |    |     |   |    |    |    |     |    |    |    |    |
| Barriers to Psychologists Seeking Mental Health Care                                                            | 6   | 0  | 0  | 1  | 1  | 0  | 0   | 0 | 0  | 0  | 0  | 2   | 1  | 1  | 0  | 0  |
| Reliability of a dietary questionnaire on food habits, eating behavior and nutritional Knowledge of adolescents | 9   | 6  | 0  | 0  | 0  | 0  | 0   | 0 | 0  | 0  | 0  | 1   | 2  | 0  | 0  | 0  |
| <b>Total</b>                                                                                                    | 961 | 63 | 45 | 37 | 87 | 35 | 119 | 6 | 14 | 14 | 25 | 290 | 99 | 78 | 18 | 31 |

## References

1. Mollem ED, Snoek FJ, Heine RJ: Assessment of perceived barriers in self-care of insulin-requiring diabetic patients. *Patient Educ Couns* 1996, 29:277–81.
2. Young M, Read J, Barker-Collo S, Harrison R: Evaluating and overcoming barriers to taking abuse histories. *Prof Psychol Res Pract* 2001, 32:407–414.
3. O'Carroll RE, Foster C, McGeechan G, Sandford K, Ferguson E: The “ick” factor, anticipated regret, and willingness to become an organ donor. *Health Psychol* 2011, 30:236–45.
4. Heinowitz AE, Brown KR, Langsam LC, Arcidiacono SJ, Baker PL, Badaan NH, Zlatkin NI, Cash RE (Gene): Identifying perceived personal barriers to public policy advocacy within psychology. *Prof Psychol Res Pract* 2012, 43:372–378.
5. Sudom K, Zamorski M, Garber B: Stigma and barriers to mental health care in deployed Canadian forces personnel. *Mil Psychol* 2012, 24:414–431.
6. Pidano AE, Kimmelblatt C a., Neace WP: Behavioral health in the pediatric primary care setting: Needs, barriers, and implications for psychologists. *Psychol Serv* 2011, 8:151–165.
7. Ouimette P, Vogt D, Wade M, Tirone V, Greenbaum M a., Kimerling R, Laffaye C, Fitt JE, Rosen CS: Perceived barriers to care among veterans health administration patients with posttraumatic stress disorder. *Psychol Serv* 2011, 8:212–223.
8. Gordon AJ, Kavanagh G, Krumm M, Ramgopal R, Paidisetty S, Aghevli M, Goodman F, Trafton J, Liberto J: Facilitators and barriers in implementing buprenorphine in the Veterans Health Administration. *Psychol Addict Behav* 2011, 25:215–24.
9. Pereplechikova F, Hilt LM, Chereji E, Kazdin AE: Barriers to implementing treatment integrity procedures: survey of treatment outcome researchers. *J Consult Clin Psychol* 2009, 77:212–8.
10. Vincent N, Lewycky S, Finnegan H: Barriers to engagement in sleep restriction and stimulus control in chronic insomnia. *J Consult Clin Psychol* 2008, 76:820–8.
11. Mansfield AK, Addis ME, Courtenay W: Measurement of Men's Help Seeking: Development and Evaluation of the Barriers to Help Seeking Scale. *Psychol Men Masc* 2005, 6:95–108.

12. Martin DJ, Brooks R a., Ortiz DJ, Veniegas RC: Perceived employment barriers and their relation to workforce-entry intent among people with HIV/AIDS. *J Occup Health Psychol* 2003, 8:181–194.
13. Catz SL, Kelly JA, Bogart LM, Benotsch EG, Mcauliffe TL: Patterns , Correlates , and Barriers to Medication Adherence Among Persons Prescribed New Treatments for HIV Disease. 2000, 19:124–133.
14. De Vos ML, van der Veer SN, Graafmans WC, de Keizer NF, Jager KJ, Westert GP, van der Voort PH: Implementing quality indicators in intensive care units: exploring barriers to and facilitators of behaviour change. *Implement Sci* 2010, 5:52.
15. Mills E, Wilson K, Rachlis B, Griffith L, Wu P, Guyatt G, Cooper C: Barriers to participation in HIV drug trials: a systematic review. *Lancet Infect Dis* 2006, 6:32–8.
16. Bryar RM, Closs SJ, Baum G, Cooke J, Griffiths J, Hostick T, Kelly S, Knight S, Marshall K, Thompson DR: The Yorkshire BARRIERS project: diagnostic analysis of barriers to research utilisation. *Int J Nurs Stud* 2003, 40:73–84.
17. Tucker CM, Rice KG, Desmond FF, Hou W, Kaye LB, Smith TM: The youth form of the Motivators of and Barriers to Health-Smart Behaviors Inventory. *Psychol Assess* 2012, 24:490–502.
18. Tu VP, Husson F, Sutan A, Ha DT, Valentin D: For me the taste of soy is not a barrier to its consumption. And how about you?. *Appetite* 2012, 58:914–21.
19. Collet J-P, Skippen PW, Mosavianpour MK, Pitfield A, Chakraborty B, Hunte G, Lindstrom R, Kissoon N, McKellin WH: Engaging pediatric intensive care unit (PICU) clinical staff to lead practice improvement: the PICU participatory action research project (PICU-PAR). *Implement Sci* 2014, 9:6.
20. Seid M, Opiari-Arrigan L, Gelhard LR, Varni JW, Driscoll K: Barriers to care questionnaire: reliability, validity, and responsiveness to change among parents of children with asthma. *Acad Pediatr* 2009, 9:106–13.
21. Cahill NE, Murch L, Cook D, Heyland DK: Barriers to feeding critically ill patients: a multicenter survey of critical care nurses. *J Crit Care* 2012, 27:727–34.
22. Welsh EM, Jeffery RW, Levy RL, Langer SL, Flood AP, Jaeb M a, Laqua PS: Measuring perceived barriers to healthful eating in obese, treatment-seeking adults. *J Nutr Educ Behav* 2012, 44:507–12.
23. Venner KL, Greenfield BL, Vicuña B, Muñoz R, Bhatt S, O'Keefe V: "I'm not one of them": barriers to help-seeking among American Indians with alcohol dependence. *Cultur Divers Ethnic Minor Psychol* 2012, 18:352–62.
24. Timen A, Hulscher MEJL, Rust L, van Steenbergen JE, Akkermans RP, Grol RPTM, van der Meer JWM: Barriers to implementing infection prevention and control guidelines during crises: experiences of health care professionals. *Am J Infect Control* 2010, 38:726–33.
25. Williams MT, Domanico J, Marques L, Leblanc NJ, Turkheimer E: Barriers to treatment among African Americans with obsessive-compulsive disorder. *J Anxiety Disord* 2012, 26:555–63.
26. Simon SL, Duncan CL, Janicke DM, Wagner MH: Barriers to treatment of paediatric obstructive sleep apnoea: Development of the adherence barriers to continuous positive airway pressure (CPAP) questionnaire. *Sleep Med* 2012, 13:172–7.
27. Aiken AM, Gold M a, Parker AM: Changes in young women's awareness, attitudes, and perceived barriers to using emergency contraception. *J Pediatr Adolesc Gynecol* 2005, 18:25–32.
28. Park E, Song M: Communication barriers perceived by older patients and nurses. *Int J Nurs Stud* 2005, 42:159–66.
29. Chou P-L, Rau K-M, Lin C-C: Development and psychometric testing of a short version of the Barriers Questionnaire-Taiwan form for cancer patients. *Int J Nurs Stud* 2011, 48:1071–9.
30. Passik SD, Kirsh KL, Donaghy K, Holtsclaw E, Theobald D, Cella D, Breitbart W: Patient-related barriers to fatigue communication: initial validation of the fatigue management barriers questionnaire. *J Pain Symptom Manage* 2002, 24:481–93.
31. Thompson JL, Davis SM, Gittelsohn J, Going S, Becenti a, Metcalfe L, Stone E, Harnack L, Ring K: Patterns of physical activity among American Indian children: an assessment of barriers and support. *J Community Health* 2001, 26:423–45.
32. Cigularov K, Chen PY, Thurber BW, Stallones L: What prevents adolescents from seeking help after a suicide education program?. *Suicide Life Threat Behav* 2008, 38:74–86.

33. Cranney M, Barton S, Walley T: Addressing barriers to change: an RCT of practice-based education to improve the management of hypertension in the elderly. *Br J Gen Pract* 1999, 49:522–6.
34. Letizia M, Creech S, Norton E, Shanahan M, Hedges L: Barriers to caregiver administration of pain medication in hospice care. *J Pain Symptom Manage* 2004, 27:114–24.
35. Chan WK, Kong H, Wai K, Sum R, Lau KO: Barriers to the Implementation of Physical Education (PE) Assessment in Hong Kong. 2006, 13.
36. McKenna HP, Ashton S, Keeney S: Barriers to evidence-based practice in primary care. *J Adv Nurs* 2004, 45:178–89.
37. Ya-Wen Chiu, Yi-Hao Weng, Heng-Lien Lo, Chih-Cheng Hsu, Ya-Hui Shih KK: Comparison of Evidence-Based Practice Between Physicians and Nurses : A National Survey of Regional Hospitals in Taiwan. *J Contin Educ Health Prof* 2010, 30:132–138.
38. Morinaga K, Ohtsubo Y, Yamauchi K, Shimada Y: Doctors' traits perceived by Japanese nurses as communication barriers: a questionnaire survey. *Int J Nurs Stud* 2008, 45:740–9.
39. Alanna Simm, Linda Li, Lynne Geddes, Diana Brooks, Alisson Hoens DR: Impact of a Behavioral-Based Intervention on Inspiratory Muscle Training Prescription by a Multidisciplinary Team. *J Contin Educ Health Prof* 2012, 32:116–125.
40. Lee C, Ory MG, Yoon J, Forjuoh SN: Neighborhood walking among overweight and obese adults: age variations in barriers and motivators. *J Community Health* 2013, 38:12–22.
41. Gunnarsdottir S, Donovan HS, Serlin RC, Voge C, Ward S: Patient-related barriers to pain management: the Barriers Questionnaire II (BQ-II). *Pain* 2002, 99:385–96.
42. Dobkin PL, de Civita M, Bernatsky S, Filipski M, Sita A, Baron M: Preliminary Validity of the Barriers To Treatment Adherence Questionnaire in Fibromyalgia: Combining Quantitative and Focus Group Data 1 , 2. *Psychol Rep* 2009, 105:447–460.
43. Bearse JL, McMinn MR, Seegobin W, Free K: Barriers to psychologists seeking mental health care. *Prof Psychol Res Pract* 2013, 44:150–157.
44. Turconi G, Celsa M, Rezzani C, Biino G, Sartirana M a, Roggi C: Reliability of a dietary questionnaire on food habits, eating behaviour and nutritional knowledge of adolescents. *Eur J Clin Nutr* 2003, 57:753–63.
45. Critical Care Nutrition: Barriers Questionnaire  
[[http://www.criticalcarenutrition.com/index.php?option=com\\_content&view=article&id=171%3Ains-barriers-questionnaire&catid=16%3Anewsroom&Itemid=1](http://www.criticalcarenutrition.com/index.php?option=com_content&view=article&id=171%3Ains-barriers-questionnaire&catid=16%3Anewsroom&Itemid=1)]
46. McCluskey A, Lovarini M: Providing education on evidence-based practice improved knowledge but did not change behaviour: a before and after study. *BMC Med Educ* 2005, 5:40.
47. Larson E: A tool to assess barriers to adherence to hand hygiene guideline. *Am J Infect Control* 2004, 32:48–51.
48. Gravel K, Légaré F, Graham ID: Barriers and facilitators to implementing shared decision-making in clinical practice: a systematic review of health professionals' perceptions. *Implement Sci* 2006, 1:16.
49. Salbach NM, Jaglal SB, Korner-bitensky N, Rappolt S, Davis D: Practitioner and Organizational Barriers to Evidence-based Practice of Physical Therapists for People With Stroke. *Phys Ther* 2007, 87:1284–1303.
50. Stichler JF, Fields W, Kim SC, Brown CE: Faculty knowledge, attitudes, and perceived barriers to teaching evidence-based nursing. *J Prof Nurs* 2011, 27:92–100.

**Table S3: The structure of original TDF and its changes over time**

The original TDF (2005) was structured on 33 psychological change theories (motivation, action and organizational theories) and consisted of 128 explanatory constructs. The original version categorized the constructs into 12 domains for explaining behavior change: (1) knowledge, (2) skills, (3) social/professional role and identity, (4) beliefs about capabilities, (5) beliefs about consequences, (6) motivation and goals, (7) memory, attention and decision processes, (8) environmental context and resources, (9) social influences, (10) emotion regulation, (11) behavioral regulation, and (12) nature of the behavior. In the TDF validation process in 2012 for developing a refined version, the number of constructs decreased to 84, expressed in 14 different domains.<sup>1</sup> The “motivation and goals” domain was separated into two domains of “intentions” and “goals”.<sup>1,2</sup> The “beliefs about consequences” was also separated into two domains; “belief about consequences” and “reinforcement”. Also a separate domain called “Optimism” was created from the “beliefs about capabilities”. Finally, the domain “nature of the behaviors” was removed from the original version.<sup>1,2</sup>

**References:**

1. Cane J, O'Connor D, Michie S, Cane, James; Dennis O'Connor; Michie S. Validation of the theoretical domains framework for use in behaviour change and implementation research. *Implement Sci.* 2012;7(37):37.
2. Michie S, Johnston M, Abraham C, Lawton R, Parker D, Walker A. Making psychological theory useful for implementing evidence based practice: a consensus approach. *Qual Saf Health Care.* 2005;14(1):26-33.
